# Supplementary material
Source: publisher site journal article supplement (https://www.dovepress.com/article/221673)
Supplement: Supplementary file 1 [file get_supplementary_file.php]

**Supplementary materials**

**Figure S1** Timeline and contents of study

Enrollment and baseline assessment

1st educational session

2nd educational session

Follow-up assessment and refreshment

Day 0

Day 30

Day 90

- Definition
- Diagnosis
- Pulmonary function test
- Clinical manifestation
- Treatment
- Vaccination
- Nutrition
- Inhaler technique
- Exercise
- Acute exacerbation and action plan
- Management of comorbidities

**Table S1** Items of questionnaire and its correct response rate before and after education

| **Items of questionnaire** | **Correct responses** | |
| --- | --- | --- |
| **Before education**  **(n=55) % (n)** | **After education**  **(n=55) % (n)** |
| **Epidemiology**  In COPD the word “chronic” means it is severe  COPD is confirmed by pulmonary function test.  In COPD there is usually gradual worsening over time | 12.7 (7)  61.8 (34)  85.5 (47) | 41.8 (23)  94.5 (52)  98.2 (54) |
|
|
| **Etiology**  More than 80% of COPD cases are caused by cigarette smoking.  COPD can be caused by occupational dust exposure.  Longstanding asthma can develop into COPD. | 74.5 (41)  72.7 (40)  50.9 (28) | 96.4 (53)  100 (55)  76.4 (42) |
| **Symptoms**  Dyspnea, cough and sputum are common symptoms in COPD. | 83.6 (46) | 100 (55) |
| **Treatment**  The mainstem of treatment in COPD is inhaled bronchodilator.  I know about the method of inhaler use.  I used inhaler regularly according to the prescription. | 67.3 (37)  63.6 (35)  80.0 (44) | 100 (55)  100 (55)  100 (55) |
| **Chest infection/exacerbation**  With chest infections phlegm can becomes colored (yellow or green).  Antibiotics and steroid can be helpful in acute exacerbation of COPD. | 58.2 (32)  40.0 (22) | 58.2 (32)  40.0 (22) |
| **Exercise in COPD**  Walking is better exercise than breathing exercises to improve fitness  Exercise can help maintain your bone density.  Exercise helps relieve depression. | 63.6 (35)  74.5 (41)  72.7 (40) | 81.8 (45)  92.7 (51)  98.2 (54) |
| **Smoking**  Stopping smoking will reduce the risk of heart disease.  Stopping smoking will slow down further lung damage.  Stopping smoking is pointless as the damage is done. | 81.8 (45)  69.1 (38)  34.5 (19) | 81.8 (45)  92.7 (51)  98.2 (54) |
| **Vaccination**  A flu jab is recommended every year.  A pneumonia jab protects against all forms of pneumonia | 87.3 (48)  16.4 (9) | 100 (55)  50.9 (28) |

**Note:** Values are expressed as percentage (number) of patients who answered correctly. Questions shown in underlined and diagonal font quoted from study in Lee et al.11 and other questions quoted from BCKQ10.

**Abbreviation:** COPD, chronic obstructive pulmonary disease; BCKQ, Bristol COPD Knowledge Questionnaire

**Table S2** Checklist of inhaler

| Step | Device type | |
| --- | --- | --- |
| MDI | DPI |
| 1 | Remove cap of inhaler | Open the device until the mouthpiece appears |
| 2 | Hold device correctly and enough exhale before inhalation | |
| 3 | Put mouthpiece between teeth and lips and close lips on inhaler | |
| 4 | Activate canister and inhalation slowly and deeply | Inhalation forcefully and deeply |
| 5 | Hold your breath for more than 5 seconds | |
| 6 | Exhale slowly after removing device | |
| 7 | Close the cap | |

**Abbreviation:** MDI, metered dose inhaler; DPI, drug powder inhaler
